# Supplementary material for: Density-dependent effects on the weight of female Ascaris lumbricoides infections of humans and its impact on patterns of egg production
Source: PubMed Central journal article supplement (PMC2672930; doi:10.1186/1756-3305-2-11), 2009-02-10
Supplement: 1756-3305-2-11-S1.pdf [file 1756-3305-2-11-S1.pdf]

## Supplementary material

### Probability distribution, variance and expected value for the zero-truncated negative binomial and lognormal distributions

The probability density function (PDF) for the zero-truncated negative binomial distribution is given by the negative binomial distribution rescaled by  $1 - P(\Lambda = 0)$ ,

$$P(\Lambda = \lambda) = \frac{\Gamma(\lambda + k)}{\Gamma(k)\lambda!} \frac{\mu_\Lambda k^k}{(\mu_\Lambda + k)^{\lambda+k}} \frac{1}{1 - \zeta^k} \quad \lambda = 1, 2 \dots \quad (\text{S1})$$

where  $\zeta = k/(\mu_\Lambda + k)$ . The expected value and variance are [83],

$$E(\Lambda) = \mu_\Lambda / (1 - \zeta^k) \quad (\text{S2})$$

$$\text{Var}(\Lambda) = E(\Lambda) \left( 1 + \frac{\mu_\Lambda}{k} + \mu_\Lambda \right) - E(\Lambda)^2 \quad (\text{S3})$$

where  $\mu_\Lambda$  is the mean of the original (non-truncated) negative binomial distribution and  $k$  is an inverse measure of the degree of overdispersion.

The PDF for the lognormal distribution is,

$$P(\Lambda = \lambda) = \frac{1}{\lambda \sigma_\Lambda \sqrt{2\pi}} \exp \left[ -\frac{(\ln(\lambda) - \mu_\Lambda)^2}{2\sigma_\Lambda^2} \right] \quad (\text{S4})$$

with expected value and variance,

$$E(\Lambda) = \exp \left( \mu_\Lambda + \frac{\sigma_\Lambda^2}{2} \right) \quad (\text{S5})$$

$$\text{Var}(\Lambda) = (\exp(\sigma_\Lambda^2) - 1) \exp(2\mu_\Lambda + \sigma_\Lambda^2) \quad (\text{S6})$$

where  $\mu_\Lambda$  and  $\sigma_\Lambda^2$  are the mean and variance of the variable's natural logarithm respectively.
